# Supplementary material
Source: PubMed Central journal article supplement (PMC4788214)
Supplement: jitm871020.w1_default.pdf [file jitm871020.w1_default.pdf]

## **Appendix 1. Sources for parameters used in the model.**

### **Proportion of non-cervical cancers caused by infection with HPV 16, HPV 18 and non-vaccine HPV types**

We conducted a brief survey of published literature on the prevalence of HPV within cancers in non-cervical sites, and HPV 16/18 prevalence in cancers associated with HPV. The most recent and/or complete meta-analyses were selected for parameterising the model. For cancers of penis the meta-analysis by Miralles-Guri *et al.*<sup>1</sup> was selected; another meta-analysis had very similar results but a smaller sample size<sup>2</sup>. For vulva and vaginal cancer the meta-analysis by de Vuyst *et al.* was selected<sup>3</sup> was selected over another meta-analysis from the same year<sup>4</sup>, again due to having a larger sample size. Separate figures for vulvar and vaginal cancers were combined for the purposes of our analysis. The same meta-analysis was used to provide the estimate of anal cancer prevalences; this was the only meta-analysis we found regarding cancers in this site.

There is less clarity with regards to oropharyngeal (including tonsillar) cancers. A meta-analysis by Kreimer *et al.*<sup>5</sup> was chosen over other studies identified<sup>6-8</sup> because this analysis provides estimates specific to the oropharynx, only included studies where HPV detection is performed by high quality PCR, and provides prevalence of both HPV overall and of type-specific HPV prevalence. The study found HPV DNA present in 28.2% of such cancers in Europe, from studies published up to February 2004. Across studies in all regions, 89% of HPV-related cancers involved type 16 or 18 DNA. European specific figures could not be extracted for the latter parameter; however, the authors state that figures are similar across geographical locations.

Other more recent studies have found the involvement of E6 or E7 oncogenes for HPV 16 in up to 60% of cancer cases<sup>9;10</sup>, but evidence for a causal link is debated<sup>10</sup>. There is some suggestion, yet to be firmly proven, of an increasing number and proportion of oropharyngeal cancers due to HPV over time, which may be due to increasing frequency of oral sex<sup>11</sup>. Due to the uncertainty, we used the figures given in the meta-analysis, and assumed that they would remain stable over time (in the absence of vaccination). HPV has also been detected in other head and neck cancers, although a causal link has not been established<sup>5</sup>, so we did not assume any vaccine protection against non- oropharyngeal head and neck cancers.

The mean and standard error around each of these estimates is shown in Tables A1-1 and A1-2. For the proportion of HPV-related cancers that were due to HPV 16/18 (where this

was not explicitly given in the text), we used the overall number of HPV-related cancers as the denominator to calculate binomial standard errors. The point estimate and uncertainty around it was then used to generate Beta distributions represent the uncertainty around the proportions; parameters of the Beta distributions are given in Tables A1-1 and A1-2 below.

| Site             | Mean | Standard error | Beta p | Beta q |
|------------------|------|----------------|--------|--------|
| Penis            | 47%  | 1.3%           | 690    | 780    |
| Vulva and vagina | 42%  | 4.3%           | 55     | 77     |
| Anus             | 84%  | 1.2%           | 800    | 150    |
| Oropharynx       | 28%  | 1.3%           | 350    | 890    |

Table A1-1. Uncertainty distribution used for proportion of cancers in different sites attributable to HPV.

| Site             | Mean | Standard error | Beta p | Beta q |
|------------------|------|----------------|--------|--------|
| Penis            | 74%  | 4.3%           | 77     | 27     |
| Vulva and vagina | 90%  | 2.9%           | 95     | 11     |
| Anus             | 93%  | 0.88%          | 760    | 56     |
| Oropharynx       | 89%  | 1.7%           | 300    | 37     |

Table A1-2. Uncertainty distribution used for proportion of HPV-related cancers in different sites attributable to HPV 16 or 18.

The number of cancers in non-cervical sites in England was obtained from the Office for National Statistics (series MB1 number 37, 2007) and is given in the Table A1-3 below:

|                    | Vulva-vagina | Anus | Oropharynx | Penis |
|--------------------|--------------|------|------------|-------|
| <b>20-24</b>       | 2            | 1    | 0          | 0     |
| <b>25-29</b>       | 5            | 4    | 2          | 1     |
| <b>30-34</b>       | 17           | 7    | 9          | 6     |
| <b>35-39</b>       | 31           | 15   | 19         | 10    |
| <b>40-44</b>       | 43           | 25   | 43         | 36    |
| <b>45-49</b>       | 58           | 26   | 46         | 46    |
| <b>50-54</b>       | 62           | 44   | 82         | 72    |
| <b>55-59</b>       | 87           | 62   | 92         | 72    |
| <b>60-64</b>       | 93           | 52   | 89         | 92    |
| <b>65-69</b>       | 109          | 60   | 86         | 69    |
| <b>70-74</b>       | 113          | 59   | 76         | 55    |
| <b>75-79</b>       | 152          | 46   | 79         | 62    |
| <b>80-84</b>       | 137          | 40   | 77         | 60    |
| <b>85 and over</b> | 227          | 57   | 91         | 63    |

Table A1-3. Number of cancers in non-cervical sites in England in 2007 (no such cancers were reported in individuals under 20 years old).

These data were used to estimate the reduction in the number of non-cervical cancers following vaccination, for a particular scenario, using the following formula:

$$N(a,t) = n(a) \times [ x \times y \times r_1(a,t) + x \times (1 - y) \times r_2(a,t) + (1 - x) ]$$

In the above formula:

$N(a,t)$  = annual cancer incidence for a particular site S (vulva/vagina, anus, oropharynx or penis) in individuals at age  $a$  and time  $t$  after vaccination

$n(a,t)$  = annual cancer incidence for site S in individuals at age  $a$  prior to vaccination (from Office for National Statistics data)

$x$  = proportion of cancers in site S attributed to HPV infection

$y$  = proportion of cancers in site S attributed to HPV infection, which are attributed to HPV 16/18

$r_1(a,t)$  = % reduction in HPV 16/18-related cervical cancer incidence in individuals at age  $a$  and time  $t$  after vaccination (from the transmission dynamic model)

$r_2(a,t)$  = % reduction in non-HPV 16/18-related cervical cancer incidence in individuals at age  $a$  and time  $t$  after vaccination (from the transmission dynamic model)

### **Correction for under-estimation of the number of cancers and pre-cancerous lesions due to non-vaccine HPV types as a result of unmasking**

To correct for under-estimation of the number of cancers and pre-cancerous lesions due to non-vaccine HPV types as a result of unmasking, a stochastic individual-based model allowing co-infection with multiple HPV types was constructed to represent HPV infection and natural history. Hence in the model, individuals moved between health states (for each HPV type) representing cervical HPV infection in the absence of dysplasia, CIN1-3, carcinoma in situ, invasive cervical cancer, having had a benign hysterectomy and being dead.

The size of the population was set to 100,000. The sampling age for each individual was selected randomly from a uniform distribution between 12 and 75 years old. At that age, each individual's hypothetical screening status is recorded (based on UK screening rates). The model was simulated to generate 1,000 duplicate runs, and the average over all runs taken. Progression rates between different health states were obtained from our previous (compartmental) natural history model of HPV<sup>12</sup>. We picked a particular scenario for this purpose (acquisition of infection from age 14 years, 100% specificity of HPV DNA testing, regression of lesions to the previous health state and high screening accuracy). Hence the results are indicative since they do not capture the full range of uncertainty in the parameter values; however, they given an indication of the magnitude of "unmasked" disease for typical parameter values. The force of infection was assumed to remain static and natural immunity was not considered, since we were not explicitly modelling the effect of vaccination (only the

proportion of HPV 16/18 disease which was actually due to other HPV types and hence may potentially be “unmasked” by vaccination).

The model was run for two scenarios: once without HPV 16/18 infection included in the model, and the second time with HPV 16/18 infection possible (including co-infection between several types). In the second simulation, an “oncogenic hierarchy”<sup>13</sup> was imposed, where a woman with cervical disease infected by several HPV types (HPV 16, 18 and/or other high-risk types) had her disease attributed to HPV 16/18 rather than the other types. The difference between the amount of HPV-related cervical disease in both simulations hence gives the amount of unmasking, i.e. disease due to non-HPV 16/18 which is “masked” by the presence of vaccine-type HPV, but will be “unmasked” (emerge) if vaccine-type HPV decreases as a result of vaccination. Results are summarised in Table A1-4. Using these results, we concluded that if all HPV 16/18 infection is removed, then number of individuals with various cytological states caused by other HPV types will appear to increase by 10.9%, 10.2%, 5.6%, 6.0%, 5.2% and 1.2% for those without lesions, with CIN1 lesions, with CIN2 lesions, with CIN3 lesions, with carcinoma in situ and with invasive cancer respectively.

|                                           | <b>HPV<br/>infected</b> | <b>CIN1</b> | <b>CIN2</b> | <b>CIN3</b> | <b>Carcinoma<br/>in situ</b> | <b>Invasive<br/>cancer</b> |
|-------------------------------------------|-------------------------|-------------|-------------|-------------|------------------------------|----------------------------|
| <b>(a) Without HPV<br/>16/18</b>          | 7,310                   | 1,140       | 317         | 271         | 392                          | 78                         |
| <b>(b) With HPV<br/>16/18</b>             | 6,600                   | 1,030       | 300         | 256         | 373                          | 77                         |
| <b>(c) Difference</b>                     | 718                     | 105         | 17          | 15          | 19                           | 1                          |
| <b>(d) % increase of<br/>(a) over (b)</b> | 10.9%                   | 10.2%       | 5.6%        | 6.0%        | 5.2%                         | 1.2%                       |

Table A1-4. Number of individuals (average over 1000 runs) in various cytological states caused by HPV types other than HPV 16/18, in a model (a) with HPV 16/18 infection and (b) without HPV 16/18 infection.

### Comparison of quality of life parameters for anogenital warts from the Woodhall study used in this model with those from other studies

Parameters used to represent the quality of life impact of anogenital warts were obtained from the only multi-centre UK-based study that meets NICE guidelines for quality of life measurements (eg. measuring quality of life directly from patients rather than from clinicians). The table below compares the values obtained from this study to those estimated in other similar studies.

| Reference                     | Country | QALY detriment                                                              | Reason(s) for not using                                                                            |
|-------------------------------|---------|-----------------------------------------------------------------------------|----------------------------------------------------------------------------------------------------|
| Woodhall et al. <sup>14</sup> | UK      | 0.018 (EQ-5D detriment)                                                     | Used in model.                                                                                     |
| Sénécal et al. <sup>15</sup>  | Canada  | 9.9 (EQ-5D weight)                                                          | Not UK based; no information on duration of episode.                                               |
| Wang et al. <sup>16</sup>     | China   | Not available                                                               | Did not use a generic quality of life measure; not UK based.                                       |
| Woodhall et al. <sup>17</sup> | Finland | QoL weight 1.9 (EQ-VAS score, for both warts and cytological abnormalities) | Combined warts and cytological abnormalities; not UK based; no information on duration of episode. |
| Woodhall et al. <sup>18</sup> | UK      | 0.0045 – 0.023 (EQ-5D)                                                      | Single centre study.                                                                               |
| Myers et al. <sup>19</sup>    | USA     | 0.02 (Time trade off)                                                       | Sample of volunteers rather than patients; not UK based.                                           |

#### Reference List

1. Miralles-Guri C, Bruni L, Cubilla AL, Castellsague X, Bosch FX, de Sanjose S. Human papillomavirus prevalence and type distribution in penile carcinoma. *J Clin Pathol* 2009;**62**:870-8.
2. Backes DM, Kurman RJ, Pimenta JM, Smith JS. Systematic review of human papillomavirus prevalence in invasive penile cancer. *Cancer Causes Control* 2009;**20**:449-57.
3. De Vuyst H, Clifford GM, Nascimento MC, Madeleine MM, Franceschi S. Prevalence and type distribution of human papillomavirus in carcinoma and intraepithelial neoplasia of the vulva, vagina and anus: a meta-analysis. *Int J Cancer* 2009;**124**:1626-36.
4. Smith JS, Backes DM, Hoots BE, Kurman RJ, Pimenta JM. Human papillomavirus type-distribution in vulvar and vaginal cancers and their associated precursors. *Obstet Gynecol* 2009;**113**:917-24.
5. Kreimer AR, Clifford GM, Boyle P, Franceschi S. Human papillomavirus types in head and neck squamous cell carcinomas worldwide: a systematic review. *Cancer Epidemiol Biomarkers Prev* 2005;**14**:467-75.

6. Miller CS, Johnstone BM. Human papillomavirus as a risk factor for oral squamous cell carcinoma: a meta-analysis, 1982-1997. *Oral Surg Oral Med Oral Pathol Oral Radiol Endod* 2001;**91**:622-35.
7. Termine N, Panzarella V, Falaschini S, Russo A, Matranga D, Lo ML *et al*. HPV in oral squamous cell carcinoma vs head and neck squamous cell carcinoma biopsies: a meta-analysis (1988-2007). *Ann Oncol* 2008;**19**:1681-90.
8. Dayyani F, Etzel CJ, Liu M, Ho CH, Lippman SM, Tsao AS. Meta-analysis of the impact of human papillomavirus (HPV) on cancer risk and overall survival in head and neck squamous cell carcinomas (HNSCC). *Head Neck Oncol* 2010;**2**:15.
9. D'Souza G, Kreimer AR, Viscidi R, Pawlita M, Fakhry C, Koch WM *et al*. Case-control study of human papillomavirus and oropharyngeal cancer. *N Engl J Med* 2007;**356**:1944-56.
10. Clifford, G. The growing evidence of an epidemiological link between oral cancers and HPV. Presented at EUROGIN 2010, Monte Carlo, Monaco, 20 Feb 2010.
11. Mehanna H, Jones TM, Gregoire V, Ang KK. Oropharyngeal carcinoma related to human papillomavirus. *BMJ* 2010;**340**:c1439.
12. Jit M, Gay N, Soldan K, Hong CY, Edmunds WJ. Estimating progression rates for human papillomavirus infection from epidemiological data. *Med Decis Making* 2010;**30**:84-98.
13. Wheeler CM, Hunt WC, Joste NE, Key CR, Quint WG, Castle PE. Human papillomavirus genotype distributions: implications for vaccination and cancer screening in the United States. *J Natl Cancer Inst* 2009;**101**:475-87.
14. Woodhall SC, Jit M, Soldan K, Kinghorn G, Gilson R, Nathan M *et al*. The impact of genital warts: loss of quality of life and cost of treatment in eight sexual health clinics in the UK. *Sex Transm Infect* 2011.
15. Senecal M, Brisson M, Maunsell E, Ferenczy A, Franco EL, Ratnam S *et al*. Loss of quality of life associated with genital warts: baseline analyses from a prospective study. *Sex Transm Infect* 2011;**87**:209-15.
16. Wang SM, Shi JF, Kang DJ, Song P, Qiao YL. Impact of human papillomavirus-related lesions on quality of life: a multicenter hospital-based study of women in Mainland China. *Int J Gynecol Cancer* 2011;**21**:182-8.
17. Woodhall S, Eriksson T, Nykanen AM, Huhtala H, Rissanen P, Apter D *et al*. Impact of HPV vaccination on young women's quality of life - a five year follow-up study. *Eur J Contracept Reprod Health Care* 2011;**16**:3-8.
18. Woodhall SC, Jit M, Cai C, Ramsey T, Zia S, Crouch S *et al*. Cost of treatment and QALYs lost due to genital warts: data for the economic evaluation of HPV vaccines in the United Kingdom. *Sex Transm Dis* 2009;**36**:515-21.
19. Myers, E. R., Green, S., and Lipkus, I. Patient preferences for health states related to HPV infection: visual analog scales vs time trade-off elicitation. 21st International Papillomavirus Conference and Clinical Workshop, Mexico City, Mexico.

## Appendix 2. Detailed numerical results

Estimated annual number of cases of cervical cancer, other HPV-related cancers and vaccine-type warts in the year 2109 under the scenarios 1-12 described in Table 1 of the main text, given use of no vaccine, the quadrivalent vaccine or the bivalent vaccine. Median and interquartile range of 10,000 Monte Carlo samples per scenario are shown.

### Cervical cancer

| Strategy | Prior to vaccination |       |       | Quadrivalent vaccination |       |       | Bivalent vaccination |       |       |
|----------|----------------------|-------|-------|--------------------------|-------|-------|----------------------|-------|-------|
|          | Median               | Upper | Lower | Median                   | Upper | Lower | Median               | Upper | Lower |
| 1        | 1,300                | 1,200 | 1,300 | 530                      | 420   | 620   | 490                  | 370   | 580   |
| 2        | 1,300                | 1,200 | 1,300 | 230                      | 160   | 280   | 170                  | 100   | 230   |
| 3        | 1,300                | 1,200 | 1,300 | 240                      | 170   | 300   | 170                  | 100   | 230   |
| 4        | 1,300                | 1,200 | 1,300 | 560                      | 450   | 640   | 530                  | 420   | 620   |
| 5        | 1,300                | 1,200 | 1,300 | 280                      | 220   | 320   | 240                  | 180   | 290   |
| 6        | 1,300                | 1,200 | 1,300 | 290                      | 230   | 340   | 240                  | 180   | 290   |
| 7        | 1,300                | 1,200 | 1,300 | 530                      | 420   | 620   | 490                  | 370   | 580   |
| 8        | 1,300                | 1,200 | 1,300 | 230                      | 160   | 280   | 170                  | 100   | 230   |
| 9        | 1,300                | 1,200 | 1,300 | 240                      | 170   | 300   | 170                  | 100   | 230   |
| 10       | 1,300                | 1,200 | 1,300 | 560                      | 450   | 640   | 530                  | 420   | 620   |
| 11       | 1,300                | 1,200 | 1,300 | 280                      | 220   | 320   | 240                  | 180   | 290   |
| 12       | 1,300                | 1,200 | 1,300 | 290                      | 230   | 340   | 240                  | 180   | 290   |

### Non-cervical cancer

| Strategy | Prior to vaccination |       |       | Quadrivalent vaccination |       |       | Bivalent vaccination |       |       |
|----------|----------------------|-------|-------|--------------------------|-------|-------|----------------------|-------|-------|
|          | Median               | Upper | Lower | Median                   | Upper | Lower | Median               | Upper | Lower |
| 1        | 2,300                | 2,300 | 2,300 | 1,800                    | 1,700 | 1,900 | 2,300                | 2,300 | 2,300 |
| 2        | 2,300                | 2,300 | 2,300 | 1,600                    | 1,600 | 1,700 | 2,300                | 2,300 | 2,300 |
| 3        | 2,300                | 2,300 | 2,300 | 1,600                    | 1,600 | 1,700 | 2,300                | 2,300 | 2,300 |
| 4        | 2,300                | 2,300 | 2,300 | 1,800                    | 1,800 | 1,900 | 2,300                | 2,300 | 2,300 |
| 5        | 2,300                | 2,300 | 2,300 | 1,700                    | 1,600 | 1,700 | 2,300                | 2,300 | 2,300 |
| 6        | 2,300                | 2,300 | 2,300 | 1,700                    | 1,600 | 1,700 | 2,300                | 2,300 | 2,300 |
| 7        | 2,300                | 2,300 | 2,300 | 1,600                    | 1,500 | 1,700 | 1,600                | 1,500 | 1,700 |
| 8        | 2,300                | 2,300 | 2,300 | 1,300                    | 1,300 | 1,400 | 1,300                | 1,200 | 1,400 |
| 9        | 2,300                | 2,300 | 2,300 | 1,300                    | 1,300 | 1,400 | 1,300                | 1,300 | 1,400 |
| 10       | 2,300                | 2,300 | 2,300 | 1,600                    | 1,500 | 1,700 | 1,600                | 1,500 | 1,700 |
| 11       | 2,300                | 2,300 | 2,300 | 1,400                    | 1,300 | 1,400 | 1,400                | 1,300 | 1,400 |
| 12       | 2,300                | 2,300 | 2,300 | 1,400                    | 1,300 | 1,400 | 1,400                | 1,300 | 1,400 |

Anogenital warts

| Strategy | Prior to vaccination |         |         | Quadrivalent vaccination |        |        | Bivalent vaccination |         |         |
|----------|----------------------|---------|---------|--------------------------|--------|--------|----------------------|---------|---------|
|          | Median               | Upper   | Lower   | Median                   | Upper  | Lower  | Median               | Upper   | Lower   |
| 1        | 120,000              | 110,000 | 130,000 | 45,000                   | 32,000 | 59,000 | 74,000               | 58,000  | 90,000  |
| 2        | 120,000              | 110,000 | 130,000 | 7,400                    | 0      | 16,000 | 110,000              | 100,000 | 120,000 |
| 3        | 120,000              | 110,000 | 130,000 | 45,000                   | 32,000 | 59,000 | 74,000               | 58,000  | 90,000  |
| 4        | 120,000              | 110,000 | 130,000 | 45,000                   | 32,000 | 59,000 | 74,000               | 58,000  | 90,000  |
| 5        | 120,000              | 110,000 | 130,000 | 7,400                    | 0      | 16,000 | 110,000              | 100,000 | 120,000 |
| 6        | 120,000              | 110,000 | 130,000 | 45,000                   | 32,000 | 59,000 | 74,000               | 58,000  | 90,000  |
| 7        | 120,000              | 110,000 | 130,000 | 45,000                   | 32,000 | 59,000 | 74,000               | 58,000  | 90,000  |
| 8        | 120,000              | 110,000 | 130,000 | 7,400                    | 0      | 16,000 | 110,000              | 100,000 | 120,000 |
| 9        | 120,000              | 110,000 | 130,000 | 45,000                   | 32,000 | 59,000 | 74,000               | 58,000  | 90,000  |
| 10       | 120,000              | 110,000 | 130,000 | 45,000                   | 32,000 | 59,000 | 74,000               | 58,000  | 90,000  |
| 11       | 120,000              | 110,000 | 130,000 | 7,400                    | 0      | 16,000 | 110,000              | 100,000 | 120,000 |
| 12       | 120,000              | 110,000 | 130,000 | 45,000                   | 32,000 | 59,000 | 74,000               | 58,000  | 90,000  |

Discounted health care costs and QALYs saved over 97 years (2012 – 2109) of a quadrivalent (figure (a) and (c)) or bivalent (figure (b) and (d)) HPV vaccination programme (2012 onwards) under the different scenarios described in Table 1 of the main text. The median and interquartile range of 10,000 samples are shown.

Quadrivalent vaccine: median

| Strategy | Costs saved (£m) |                 |                            |               |       |                        |
|----------|------------------|-----------------|----------------------------|---------------|-------|------------------------|
|          | Screening        | Cervical cancer | Vulvar/vaginal/anal cancer | Other cancers | Warts | HPV 6/11 lesions + RRP |
| 1        | 53               | 110             | 60                         | 0             | 160   | 9                      |
| 2        | 79               | 150             | 77                         | 0             | 240   | 13                     |
| 3        | 78               | 140             | 76                         | 0             | 160   | 9                      |
| 4        | 41               | 110             | 57                         | 0             | 160   | 9                      |
| 5        | 59               | 140             | 73                         | 0             | 240   | 13                     |
| 6        | 59               | 140             | 72                         | 0             | 160   | 9                      |
| 7        | 53               | 110             | 60                         | 30            | 160   | 9                      |
| 8        | 79               | 150             | 77                         | 39            | 240   | 13                     |
| 9        | 78               | 140             | 76                         | 39            | 160   | 9                      |
| 10       | 41               | 110             | 57                         | 28            | 160   | 9                      |
| 11       | 59               | 140             | 73                         | 36            | 240   | 13                     |
| 12       | 59               | 140             | 72                         | 35            | 160   | 9                      |



| QALYs saved ('000s) |           |                 |                            |               |       |                        |   |
|---------------------|-----------|-----------------|----------------------------|---------------|-------|------------------------|---|
| Strategy            | Screening | Cervical cancer | Vulvar/vaginal/anal cancer | Other cancers | Warts | HPV 6/11 lesions + RRP |   |
| 1                   | 22        | 45              |                            | 26            | 0     | 26                     | 1 |
| 2                   | 32        | 61              |                            | 34            | 0     | 38                     | 1 |
| 3                   | 32        | 60              |                            | 34            | 0     | 26                     | 1 |
| 4                   | 17        | 44              |                            | 25            | 0     | 26                     | 1 |
| 5                   | 24        | 58              |                            | 33            | 0     | 38                     | 1 |
| 6                   | 24        | 57              |                            | 32            | 0     | 26                     | 1 |
| 7                   | 22        | 45              |                            | 26            | 13    | 26                     | 1 |
| 8                   | 32        | 61              |                            | 34            | 17    | 38                     | 1 |
| 9                   | 32        | 60              |                            | 34            | 17    | 26                     | 1 |
| 10                  | 17        | 44              |                            | 25            | 12    | 26                     | 1 |
| 11                  | 24        | 58              |                            | 33            | 16    | 38                     | 1 |
| 12                  | 24        | 57              |                            | 32            | 16    | 26                     | 1 |

Quadrivalent vaccine: upper quartile

| Costs saved (£m) |           |                 |                            |               |       |                        |    |
|------------------|-----------|-----------------|----------------------------|---------------|-------|------------------------|----|
| Strategy         | Screening | Cervical cancer | Vulvar/vaginal/anal cancer | Other cancers | Warts | HPV 6/11 lesions + RRP |    |
| 1                | 70        | 170             |                            | 96            | 0     | 200                    | 17 |
| 2                | 100       | 220             |                            | 120           | 0     | 260                    | 24 |
| 3                | 100       | 220             |                            | 120           | 0     | 200                    | 17 |
| 4                | 55        | 170             |                            | 92            | 0     | 200                    | 17 |
| 5                | 78        | 210             |                            | 120           | 0     | 260                    | 24 |
| 6                | 78        | 210             |                            | 110           | 0     | 200                    | 17 |
| 7                | 70        | 170             |                            | 96            | 47    | 200                    | 17 |
| 8                | 100       | 220             |                            | 120           | 60    | 260                    | 24 |
| 9                | 100       | 220             |                            | 120           | 60    | 200                    | 17 |
| 10               | 55        | 170             |                            | 92            | 43    | 200                    | 17 |
| 11               | 78        | 210             |                            | 120           | 55    | 260                    | 24 |
| 12               | 78        | 210             |                            | 110           | 54    | 200                    | 17 |

| QALYs saved ('000s) |           |                 |                            |               |       |                        |    |
|---------------------|-----------|-----------------|----------------------------|---------------|-------|------------------------|----|
| Strategy            | Screening | Cervical cancer | Vulvar/vaginal/anal cancer | Other cancers | Warts | HPV 6/11 lesions + RRP |    |
| 1                   | 28        | 28              |                            | 50            | 29    | 0                      | 33 |
| 2                   | 41        | 41              |                            | 64            | 37    | 0                      | 47 |
| 3                   | 41        | 41              |                            | 63            | 36    | 0                      | 33 |
| 4                   | 22        | 22              |                            | 48            | 28    | 0                      | 33 |
| 5                   | 31        | 31              |                            | 61            | 35    | 0                      | 47 |

|           |    |    |    |    |    |    |
|-----------|----|----|----|----|----|----|
| <b>6</b>  | 31 | 31 | 61 | 35 | 0  | 33 |
| <b>7</b>  | 28 | 28 | 50 | 29 | 15 | 33 |
| <b>8</b>  | 41 | 41 | 64 | 37 | 19 | 47 |
| <b>9</b>  | 41 | 41 | 63 | 36 | 18 | 33 |
| <b>10</b> | 22 | 22 | 48 | 28 | 14 | 33 |
| <b>11</b> | 31 | 31 | 61 | 35 | 17 | 47 |
| <b>12</b> | 31 | 31 | 61 | 35 | 17 | 33 |

Quadrivalent vaccine: lower quartile

| <b>Costs saved (£m)</b> |                  |                        |                                   |                      |              |                               |          |
|-------------------------|------------------|------------------------|-----------------------------------|----------------------|--------------|-------------------------------|----------|
| <b>Strategy</b>         | <b>Screening</b> | <b>Cervical cancer</b> | <b>Vulvar/vaginal/anal cancer</b> | <b>Other cancers</b> | <b>Warts</b> | <b>HPV 6/11 lesions + RRP</b> | <b>s</b> |
| <b>1</b>                | 38               | 74                     | 37                                | 0                    | 130          | 5                             | 5        |
| <b>2</b>                | 56               | 93                     | 47                                | 0                    | 220          | 8                             | 8        |
| <b>3</b>                | 56               | 92                     | 46                                | 0                    | 130          | 5                             | 5        |
| <b>4</b>                | 30               | 71                     | 36                                | 0                    | 130          | 5                             | 5        |
| <b>5</b>                | 42               | 90                     | 45                                | 0                    | 220          | 8                             | 8        |
| <b>6</b>                | 42               | 89                     | 44                                | 0                    | 130          | 5                             | 5        |
| <b>7</b>                | 38               | 74                     | 37                                | 19                   | 130          | 5                             | 5        |
| <b>8</b>                | 56               | 93                     | 47                                | 24                   | 220          | 8                             | 8        |
| <b>9</b>                | 56               | 92                     | 46                                | 24                   | 130          | 5                             | 5        |
| <b>10</b>               | 30               | 71                     | 36                                | 18                   | 130          | 5                             | 5        |
| <b>11</b>               | 42               | 90                     | 45                                | 22                   | 220          | 8                             | 8        |
| <b>12</b>               | 42               | 89                     | 44                                | 22                   | 130          | 5                             | 5        |

| <b>QALYs saved ('000s)</b> |                  |                        |                                   |                      |              |                               |          |
|----------------------------|------------------|------------------------|-----------------------------------|----------------------|--------------|-------------------------------|----------|
| <b>Strategy</b>            | <b>Screening</b> | <b>Cervical cancer</b> | <b>Vulvar/vaginal/anal cancer</b> | <b>Other cancers</b> | <b>Warts</b> | <b>HPV 6/11 lesions + RRP</b> | <b>s</b> |
| <b>1</b>                   | 16               | 41                     | 23                                | 0                    | 19           | 1                             | 1        |
| <b>2</b>                   | 23               | 56                     | 32                                | 0                    | 30           | 1                             | 1        |
| <b>3</b>                   | 23               | 55                     | 32                                | 0                    | 19           | 1                             | 1        |
| <b>4</b>                   | 12               | 40                     | 22                                | 0                    | 19           | 1                             | 1        |
| <b>5</b>                   | 17               | 54                     | 30                                | 0                    | 30           | 1                             | 1        |
| <b>6</b>                   | 17               | 53                     | 30                                | 0                    | 19           | 1                             | 1        |
| <b>7</b>                   | 16               | 41                     | 23                                | 12                   | 19           | 1                             | 1        |
| <b>8</b>                   | 23               | 56                     | 32                                | 16                   | 30           | 1                             | 1        |
| <b>9</b>                   | 23               | 55                     | 32                                | 16                   | 19           | 1                             | 1        |
| <b>10</b>                  | 12               | 40                     | 22                                | 11                   | 19           | 1                             | 1        |
| <b>11</b>                  | 17               | 54                     | 30                                | 15                   | 30           | 1                             | 1        |
| <b>12</b>                  | 17               | 53                     | 30                                | 14                   | 19           | 1                             | 1        |

Bivalent vaccine: median

| <b>Costs saved (£m)</b> |                  |                        |                                   |                      |    |
|-------------------------|------------------|------------------------|-----------------------------------|----------------------|----|
| <b>Strategy</b>         | <b>Screening</b> | <b>Cervical cancer</b> | <b>Vulvar/vaginal/anal cancer</b> | <b>Other cancers</b> |    |
| 1                       | 65               | 120                    |                                   | 0                    | 0  |
| 2                       | 95               | 150                    |                                   | 0                    | 0  |
| 3                       | 95               | 150                    |                                   | 0                    | 0  |
| 4                       | 50               | 110                    |                                   | 0                    | 0  |
| 5                       | 71               | 150                    |                                   | 0                    | 0  |
| 6                       | 71               | 150                    |                                   | 0                    | 0  |
| 7                       | 65               | 120                    |                                   | 61                   | 31 |
| 8                       | 95               | 150                    |                                   | 78                   | 40 |
| 9                       | 95               | 150                    |                                   | 78                   | 40 |
| 10                      | 50               | 110                    |                                   | 57                   | 28 |
| 11                      | 71               | 150                    |                                   | 73                   | 36 |
| 12                      | 71               | 150                    |                                   | 73                   | 36 |

| <b>QALYs saved ('000s)</b> |                  |                        |                                   |                      |    |
|----------------------------|------------------|------------------------|-----------------------------------|----------------------|----|
| <b>Strategy</b>            | <b>Screening</b> | <b>Cervical cancer</b> | <b>Vulvar/vaginal/anal cancer</b> | <b>Other cancers</b> |    |
| 1                          | 27               | 47                     |                                   | 0                    | 0  |
| 2                          | 39               | 63                     |                                   | 0                    | 0  |
| 3                          | 39               | 63                     |                                   | 0                    | 0  |
| 4                          | 20               | 45                     |                                   | 0                    | 0  |
| 5                          | 29               | 60                     |                                   | 0                    | 0  |
| 6                          | 29               | 60                     |                                   | 0                    | 0  |
| 7                          | 27               | 47                     |                                   | 26                   | 13 |
| 8                          | 39               | 63                     |                                   | 35                   | 18 |
| 9                          | 39               | 63                     |                                   | 35                   | 18 |
| 10                         | 20               | 45                     |                                   | 25                   | 12 |
| 11                         | 29               | 60                     |                                   | 33                   | 16 |
| 12                         | 29               | 60                     |                                   | 33                   | 16 |

Bivalent vaccine: upper quartile

| <b>Costs saved (£m)</b> |                  |                        |                                   |                      |   |
|-------------------------|------------------|------------------------|-----------------------------------|----------------------|---|
| <b>Strategy</b>         | <b>Screening</b> | <b>Cervical cancer</b> | <b>Vulvar/vaginal/anal cancer</b> | <b>Other cancers</b> |   |
| 1                       | 86               | 180                    |                                   | 0                    | 0 |
| 2                       | 120              | 230                    |                                   | 0                    | 0 |
| 3                       | 120              | 230                    |                                   | 0                    | 0 |
| 4                       | 66               | 170                    |                                   | 0                    | 0 |

|           |     |     |     |    |
|-----------|-----|-----|-----|----|
| <b>5</b>  | 94  | 220 | 0   | 0  |
| <b>6</b>  | 94  | 220 | 0   | 0  |
| <b>7</b>  | 86  | 180 | 97  | 48 |
| <b>8</b>  | 120 | 230 | 120 | 62 |
| <b>9</b>  | 120 | 230 | 120 | 62 |
| <b>10</b> | 66  | 170 | 92  | 43 |
| <b>11</b> | 94  | 220 | 120 | 55 |
| <b>12</b> | 94  | 220 | 120 | 55 |

| <b>QALYs saved ('000s)</b> |                  |                        |                                   |                      |
|----------------------------|------------------|------------------------|-----------------------------------|----------------------|
| <b>Strategy</b>            | <b>Screening</b> | <b>Cervical cancer</b> | <b>Vulvar/vaginal/anal cancer</b> | <b>Other cancers</b> |
| <b>1</b>                   | 35               | 52                     | 0                                 | 0                    |
| <b>2</b>                   | 50               | 67                     | 0                                 | 0                    |
| <b>3</b>                   | 50               | 67                     | 0                                 | 0                    |
| <b>4</b>                   | 27               | 50                     | 0                                 | 0                    |
| <b>5</b>                   | 37               | 63                     | 0                                 | 0                    |
| <b>6</b>                   | 37               | 63                     | 0                                 | 0                    |
| <b>7</b>                   | 35               | 52                     | 30                                | 15                   |
| <b>8</b>                   | 50               | 67                     | 37                                | 19                   |
| <b>9</b>                   | 50               | 67                     | 37                                | 19                   |
| <b>10</b>                  | 27               | 50                     | 28                                | 14                   |
| <b>11</b>                  | 37               | 63                     | 35                                | 17                   |
| <b>12</b>                  | 37               | 63                     | 35                                | 17                   |

Bivalent vaccine: lower quartile

| <b>Costs saved (£m)</b> |                  |                        |                                   |                      |
|-------------------------|------------------|------------------------|-----------------------------------|----------------------|
| <b>Strategy</b>         | <b>Screening</b> | <b>Cervical cancer</b> | <b>Vulvar/vaginal/anal cancer</b> | <b>Other cancers</b> |
| <b>1</b>                | 47               | 77                     | 0                                 | 0                    |
| <b>2</b>                | 69               | 98                     | 0                                 | 0                    |
| <b>3</b>                | 69               | 98                     | 0                                 | 0                    |
| <b>4</b>                | 36               | 74                     | 0                                 | 0                    |
| <b>5</b>                | 51               | 94                     | 0                                 | 0                    |
| <b>6</b>                | 51               | 94                     | 0                                 | 0                    |
| <b>7</b>                | 47               | 77                     | 38                                | 20                   |
| <b>8</b>                | 69               | 98                     | 48                                | 25                   |
| <b>9</b>                | 69               | 98                     | 48                                | 25                   |
| <b>10</b>               | 36               | 74                     | 36                                | 18                   |
| <b>11</b>               | 51               | 94                     | 45                                | 22                   |
| <b>12</b>               | 51               | 94                     | 45                                | 22                   |

| Strategy | QALYs saved ('000s) |                 |                            |               |
|----------|---------------------|-----------------|----------------------------|---------------|
|          | Screening           | Cervical cancer | Vulvar/vaginal/anal cancer | Other cancers |
| 1        | 19                  | 43              | 0                          | 0             |
| 2        | 29                  | 58              | 0                          | 0             |
| 3        | 29                  | 58              | 0                          | 0             |
| 4        | 15                  | 41              | 0                          | 0             |
| 5        | 21                  | 56              | 0                          | 0             |
| 6        | 21                  | 56              | 0                          | 0             |
| 7        | 19                  | 43              | 24                         | 12            |
| 8        | 29                  | 58              | 32                         | 17            |
| 9        | 29                  | 58              | 32                         | 17            |
| 10       | 15                  | 41              | 22                         | 11            |
| f11      | 21                  | 56              | 30                         | 15            |
| 12       | 21                  | 56              | 30                         | 15            |

Benefits of the quadrivalent and bivalent vaccine that contribute towards the difference in price for the two vaccines to be equally cost-effective (median of 10,000 samples). One QALY is assumed to be valued at £30,000. The two benefits of the bivalent vaccine (additional cross-protection and in some scenarios longer duration) contribute negatively towards the price difference (i.e. they make an equally cost-effective quadrivalent vaccine cost less).

Quadrivalent vaccine advantages (value in £ per dose)

| Scenario | Vulvar/vaginal/anal cancer |       |       | Warts  |       |       | RRPs + HPV 6/11 lesions |       |       |
|----------|----------------------------|-------|-------|--------|-------|-------|-------------------------|-------|-------|
|          | Median                     | Lower | Upper | Median | Lower | Upper | Median                  | Lower | Upper |
|          |                            |       | r     |        |       | r     |                         |       | r     |
| 1        | 26                         | 23    | 30    | 29     | 23    | 37    | 1.3                     | 0.87  | 1.9   |
| 2        | 35                         | 32    | 37    | 43     | 35    | 51    | 1.8                     | 1.3   | 2.6   |
| 3        | 34                         | 32    | 37    | 29     | 23    | 37    | 1.3                     | 0.87  | 1.9   |
| 4        | 25                         | 22    | 29    | 29     | 23    | 37    | 1.3                     | 0.87  | 1.9   |
| 5        | 33                         | 31    | 36    | 43     | 35    | 51    | 1.8                     | 1.3   | 2.6   |
| 6        | 33                         | 30    | 35    | 29     | 23    | 37    | 1.3                     | 0.87  | 1.9   |
| 7        | 0                          | 0     | 0     | 29     | 23    | 37    | 1.3                     | 0.87  | 1.9   |
| 8        | 0                          | 0     | 0     | 43     | 35    | 51    | 1.8                     | 1.3   | 2.6   |
| 9        | 0                          | 0     | 0     | 29     | 23    | 37    | 1.3                     | 0.87  | 1.9   |
| 10       | 0                          | 0     | 0     | 29     | 23    | 37    | 1.3                     | 0.87  | 1.9   |
| 11       | 0                          | 0     | 0     | 43     | 35    | 51    | 1.8                     | 1.3   | 2.6   |
| 12       | 0                          | 0     | 0     | 29     | 23    | 37    | 1.3                     | 0.87  | 1.9   |

Bivalent vaccine advantages (value in £ per dose)

| Scenario  | Cross-protection |       |       | Extended duration |       |       |
|-----------|------------------|-------|-------|-------------------|-------|-------|
|           | Median           | Lower | Upper | Median            | Lower | Upper |
| <b>1</b>  | 7.1              | 8.5   | 5.8   | 0                 | 0     | 0     |
| <b>2</b>  | 9.4              | 11    | 7.8   | 0                 | 0     | 0     |
| <b>3</b>  | 9.4              | 11    | 7.8   | 0.87              | 0.95  | 0.65  |
| <b>4</b>  | 5.1              | 6.2   | 4.2   | 0                 | 0     | 0     |
| <b>5</b>  | 7.1              | 8.5   | 5.8   | 0                 | 0     | 0     |
| <b>6</b>  | 7.1              | 8.5   | 5.8   | 0.88              | 0.85  | 0.81  |
| <b>7</b>  | 7.8              | 9.2   | 6.5   | 0                 | 0     | 0     |
| <b>8</b>  | 10               | 12    | 8.6   | 0                 | 0     | 0     |
| <b>9</b>  | 10               | 12    | 8.6   | 1.6               | 1.8   | 1.2   |
| <b>10</b> | 5.1              | 6.2   | 4.2   | 0                 | 0     | 0     |
| <b>11</b> | 7.1              | 8.5   | 5.8   | 0                 | 0     | 0     |
| <b>12</b> | 7.1              | 8.5   | 5.8   | 1.6               | 1.6   | 1.4   |
